# Supplementary material for: In situ P-doping induced Se vacancies enhance the supercapacitor performance of NiCo2Se4
Source: Royal Society of Chemistry journal article supplement (doi:10.1039/d4ce00048j), 2024-01-01
Supplement: d4ce00048j1.pdf [file d4ce00048j1.pdf]

## Supporting information

### **P-doped in situ induced Se vacancy enhances the supercapacitor performance of NiCo<sub>2</sub>Se<sub>4</sub>**

*Miaomiao Wang<sup>†a</sup>, Weizhe Liu<sup>†a</sup>, Li Zhang<sup>†a\*</sup>, Huanli Liu<sup>a</sup> and Xiao Yang<sup>a</sup>*

*<sup>a</sup>School of Science, Lanzhou University of Technology, Lanzhou 730050, PR China*

*<sup>†</sup>These authors contributed equally to this work.*

#### **\*Corresponding author:**

Dr. Li Zhang

Department of Physics, School of Science,

Lanzhou University of Technology,

Lanzhou, Gansu, 730050, P. R. China.

E-mail: zhangli@lut.edu.cn

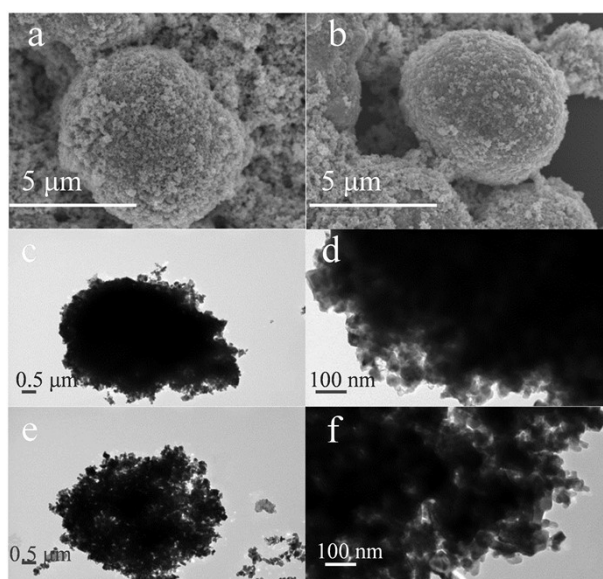

**Fig. S1** (a) SEM images of  $\text{NiCo}_2\text{Se}_x\text{-P}_{0.5}$ , (b) SEM images of  $\text{NiCo}_2\text{Se}_x\text{-P}_2$ , (c-d) TEM images of  $\text{NiCo}_2\text{Se}_x\text{-P}_{0.5}$ , (e-f) TEM images of  $\text{NiCo}_2\text{Se}_x\text{-P}_2$ .

SEM images of  $\text{NiCo}_2\text{Se}_x\text{-P}_{0.5}$  and  $\text{NiCo}_2\text{Se}_x\text{-P}_2$  are shown in Fig. S1(a-b). After the phosphating treatment, both  $\text{NiCo}_2\text{Se}_x\text{-P}_{0.5}$  and  $\text{NiCo}_2\text{Se}_x\text{-P}_2$  showed a microsphere morphology with an average size of 5  $\mu\text{m}$ , and the spherical surface was covered with a large number of nanoparticles. The low-magnification TEM images of  $\text{NiCo}_2\text{Se}_x\text{-P}_{0.5}$  and  $\text{NiCo}_2\text{Se}_x\text{-P}_2$  are shown in Fig. S1(c-f), and their size is about 5  $\mu\text{m}$ , which is in agreement with the SEM results. Compared with  $\text{NiCo}_2\text{Se}_x\text{-P}_1$  material, they are all microspheres, but further observation can be found that the surface of  $\text{NiCo}_2\text{Se}_x\text{-P}_1$  material is needle-like, which may be that the amount of phosphorus doping will have some effect on its morphology, resulting in differences in the surface structure of the material. As for  $\text{NiCo}_2\text{Se}_x\text{-P}_1$ , the mesh structure formed by interconnecting neighboring nano-needles on its surface has abundant pores, and this multi-channel structure can accelerate the rapid penetration of electrolyte ions in the active material. Therefore, the electrochemical performance of  $\text{NiCo}_2\text{Se}_x\text{-P}_1$  obtained after phosphorization treatment are better than the other two samples. Based on this we consider  $\text{NiCo}_2\text{Se}_x\text{-P}_1$  as a typical sample for research.

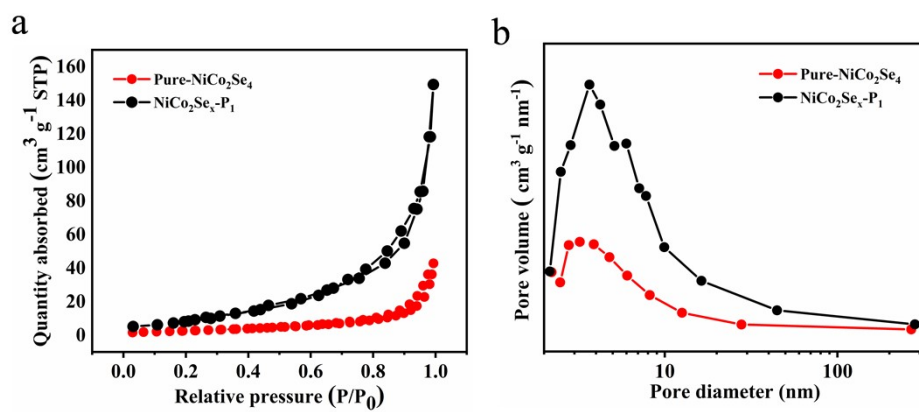

**Fig. S2** (a) N<sub>2</sub> adsorption/desorption isotherm, (b) Pore size distribution.

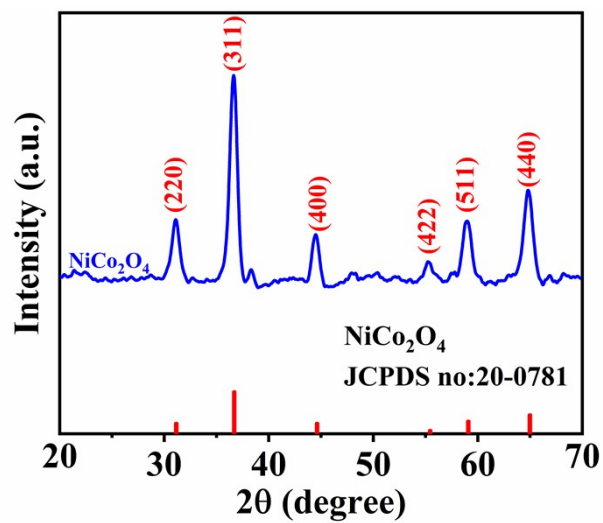

**Fig. S3** XRD pattern of NiCo precursor.

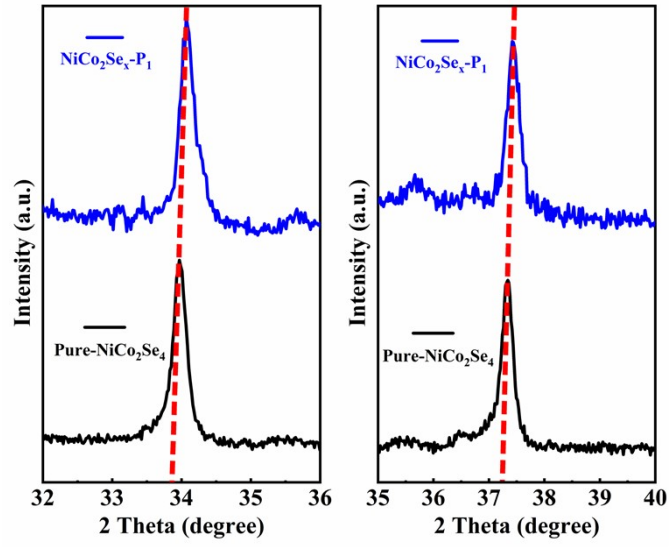

**Fig. S4** XRD comparison of ( 210 ) and ( 211 ) crystal planes of Pure-NiCo<sub>2</sub>Se<sub>4</sub> and NiCo<sub>2</sub>Se<sub>x</sub>-P<sub>1</sub>.

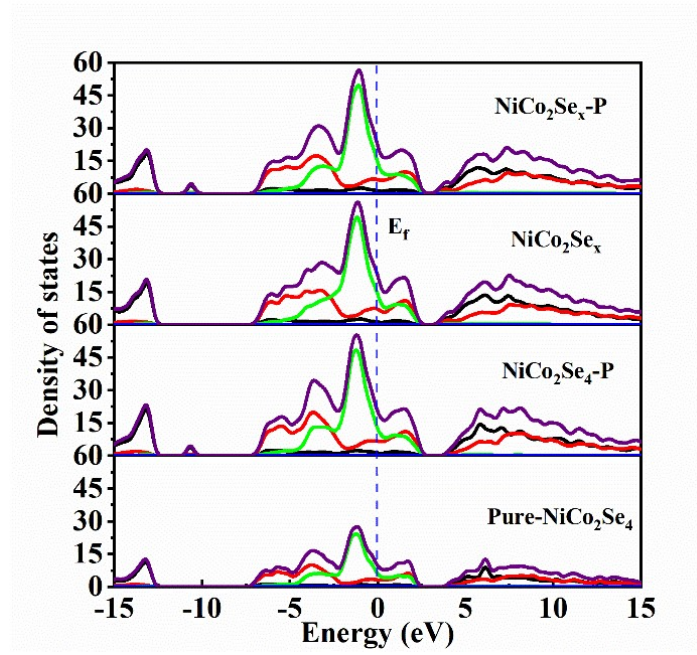

**Fig. S5** DOS diagrams of Pure-NiCo<sub>2</sub>Se<sub>4</sub>, NiCo<sub>2</sub>Se<sub>4</sub>-P, NiCo<sub>2</sub>Se<sub>x</sub> and NiCo<sub>2</sub>Se<sub>x</sub>-P.

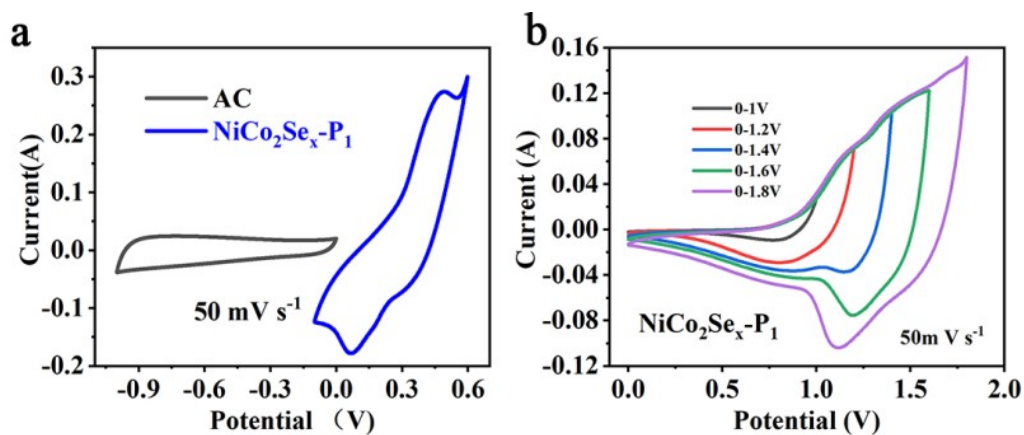

**Fig. S6** (a) Comparison of CV curves of AC electrode and  $\text{NiCo}_2\text{Se}_x\text{-P}_1$  electrode at  $50 \text{ mV s}^{-1}$  scan rate, (b) CV curves of different voltage windows at  $\text{NiCo}_2\text{Se}_x\text{-P}_1//\text{AC}$  scan rate of  $50 \text{ mV s}^{-1}$ .

**Table. S1** Performance comparison of  $\text{NiCo}_2\text{Se}_x\text{-P}_1//\text{AC}$  devices with recently reported hybrid supercapacitors

| Supercapacitor device                                                  | energy density ( $\text{Wh kg}^{-1}$ ) | power density ( $\text{W kg}^{-1}$ ) | Reference        |
|------------------------------------------------------------------------|----------------------------------------|--------------------------------------|------------------|
| $\text{CoNi}_2\text{S}_4/\text{Bi}_2\text{O}_3$                        | 86.6                                   | 1600                                 | 1                |
| $\text{Ni}_2\text{Co}_4\text{Se}_4/\text{HPC}$                         | 34.8                                   | 399.9                                | 2                |
| $\text{NiCo}_2\text{Se}_4/\text{rGO}/\text{TRGO}$                      | 37.83                                  | 1433.55                              | 3                |
| $(\text{Ni}_{0.33}\text{Co}_{0.67})\text{Se}_2 \text{ CHSs}/\text{AC}$ | 29.1                                   | 800                                  | 4                |
| $\text{NiCo}_2\text{Se}_4/\text{AC}$                                   | 25                                     | 490                                  | 5                |
| $\text{Ni}_{0.67}\text{Co}_{0.33}\text{Se}/\text{RGO}$                 | 36.7                                   | 750                                  | 6                |
| $(\text{Ni}_{0.5}\text{Co}_{0.5})_{0.85}\text{Se}/\text{carbon}$       | 70.58                                  | 320.02                               | 7                |
| <b><math>\text{NiCo}_2\text{Se}_x\text{-P}_1/\text{AC}</math></b>      | <b>94.61</b>                           | <b>799.92</b>                        | <b>This work</b> |

## References

- 1 J. Zhao, Z. Li, T. Shen, X. Yuan, G. Qiu, Q. Jiang, Y. Lin, G. Song, A. Meng and Q. Li, *J. Mater. Chem. A*, 2019, 7, 7918-7931.
- 2 Z. Xie, D. Qiu, J. Xia, J. Wei, M. Li, F. Wang and R. Yang, *ACS Appl. Mater. Interfaces*, 2021, 13, 12006-12015.
- 3 S. Ghosh, P. Samanta, P. Samanta, N. C. Murmu and T. Kuila, *Energy Fuels*, 2020, 34, 13056-13066.
- 4 L. Quan, T. Liu, M. Yi, Q. Chen, D. Cai and H. Zhan, *Electrochim. Acta*, 2018, 281, 109-116.
- 5 S. Li, Y. Ruan and Q. Xie, *Electrochim. Acta*, 2020, 356, 136837.
- 6 H. Chen, S. Chen, M. Fan, C. Li, D. Chen, G. Tian and K. Shu, *J. Mater. Chem. A*, 2015, 3, 23653-23659.
- 7 L. Du, W. Du, Y. Zhao, N. Wang, Z. Yao, S. Wei, Y. Shi and B. Zhang, *J. Alloys Compd.*, 2019, 778, 848-857.
